# Supplementary material for: Synthesis and photophysical properties of benzoxazolyl-imidazole and benzothiazolyl-imidazole conjugates
Source: Royal Society of Chemistry journal article supplement (doi:10.1039/d1ra08342b), 2021-01-01
Supplement: d1ra08342b1.pdf [file d1ra08342b1.pdf]

# Synthesis and photophysical properties of benzoxazolyl-imidazole and benzothiazolyl- imidazole conjugates

Hsing-Yu Chen, Chen-Chen Yao, Tzu-Yu Tseng, Yao-Chun Yeh, He-Shin Huang  
and Mei-Yu Yeh\*

Department of Chemistry, Chung Yuan Christian University, No. 200, Zhongbei Rd., Zhongli  
Dist., Taoyuan City 320314, Taiwan

| <b>Contents</b>                                    | <b>Page Number</b> |
|----------------------------------------------------|--------------------|
| 1. Fig S1. Excitation spectra                      | 2                  |
| 2. Fig S2. The geometrical optimization structures | 2                  |
| 3. Fig S3. NBO charge distribution                 | 3                  |
| 4. Table S1                                        | 3                  |
| 5. Fig. S4 and S5 <sup>1</sup> H NMR spectra       | 4                  |
| 6. Fig. S6 and S7 HRMS spectra                     | 5                  |

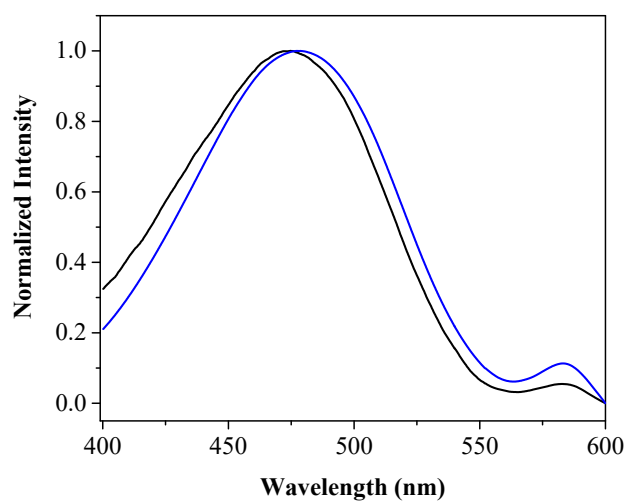

**Fig. S1** Excitation spectra of **6b** with excitation wavelength at 620 nm. (black: 100  $\mu\text{M}$ ; blue: 500  $\mu\text{M}$ )

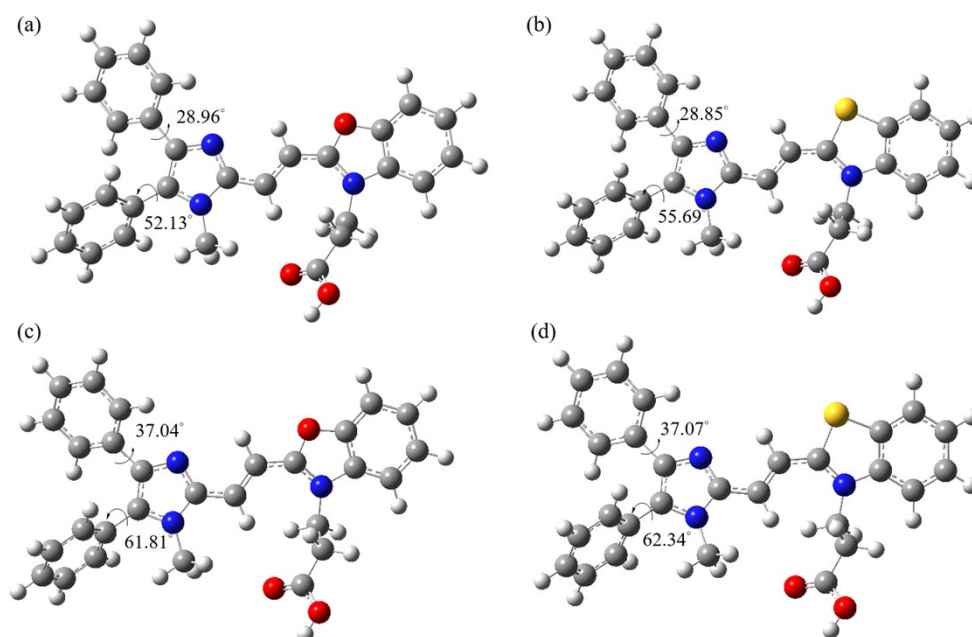

**Fig. S2** The geometrical optimization structures of (a, c) **6a<sup>+</sup>** and (b, d) **6b<sup>+</sup>**. (a, b) calculated by using DFT/B3LYP/6-31G (d,p); (c, d) calculated by using HF/6-31G (d,p). C: gray; H: white; N: blue; O: red; S: yellow.

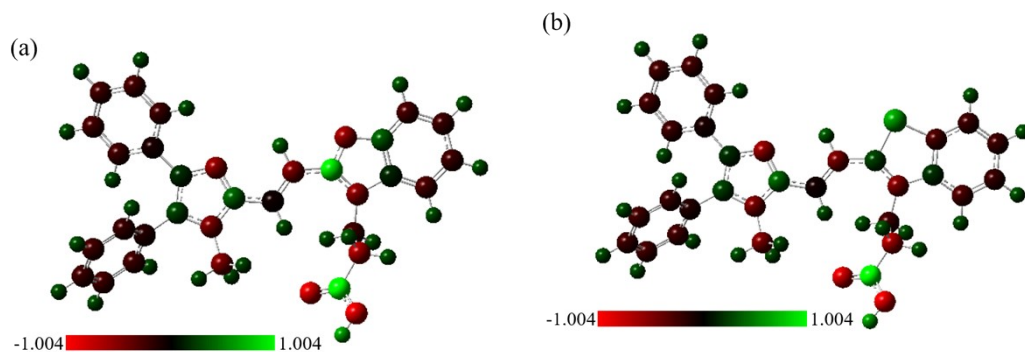

Fig. S3. NBO charge distribution on the optimized (a)  $6a^+$  and (b)  $6b^+$  designated by color change on the atoms with color scheme and scale (red for negative charge and green for positive charge), determined using HF/6-31G (d,p) level.

**Table S1** Absorption spectra were obtained using TD-DFT methods for  $6a^+$  and  $6b^+$ .<sup>a</sup>

|        | Optimized Geometries | Absorption (eV) | Electronic transitions | Oscillator strength |
|--------|----------------------|-----------------|------------------------|---------------------|
| $6a^+$ | DFT <sup>b</sup>     | 2.3319          | H→L (0.69155)          | 0.7662              |
|        | HF <sup>c</sup>      | 2.3954          | H→L (0.62171)          | 0.5869              |
| $6b^+$ | DFT <sup>b</sup>     | 2.2435          | H→L (0.69333)          | 0.8094              |
|        | HF <sup>c</sup>      | 2.2707          | H→L (0.61790)          | 0.6040              |

[a] For  $6a^+$ , X is oxygen atom; for  $6b^+$ , X is sulfur atom; [b] DFT/B3LYP/6-31G (d,p);

[c] HF/6-31G (d,p).

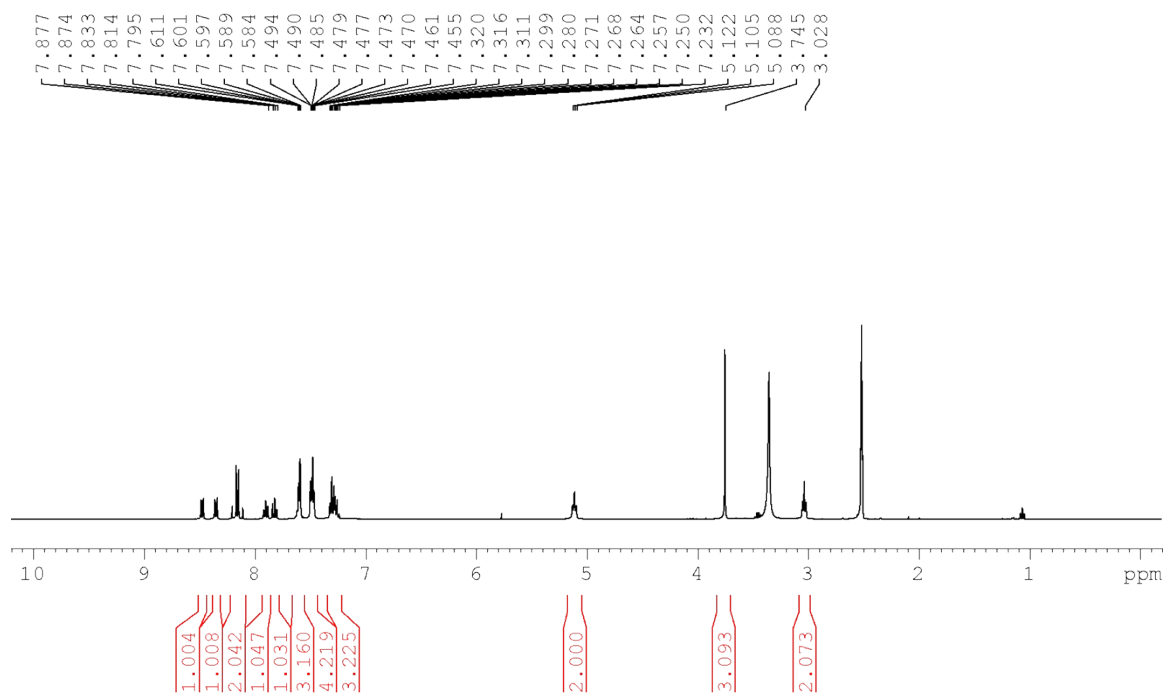

**Fig. S4**  $^1\text{H}$  NMR spectrum for **6a** in  $\text{DMSO-}d_6$ .

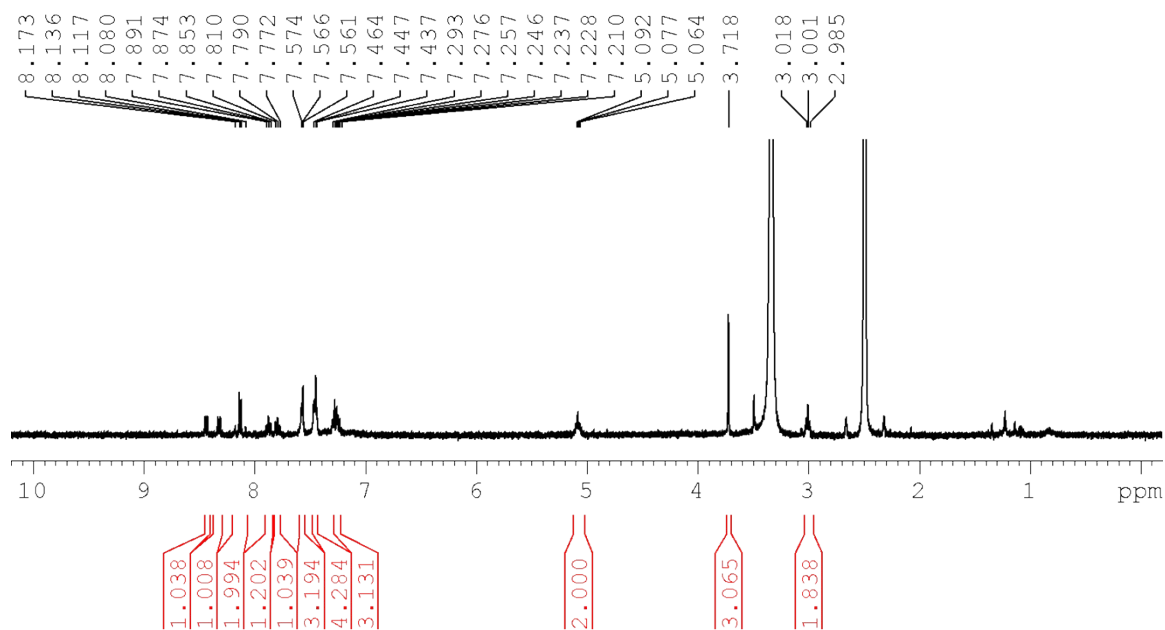

**Fig. S5**  $^1\text{H}$  NMR spectrum for **6b** in  $\text{DMSO-}d_6$ .

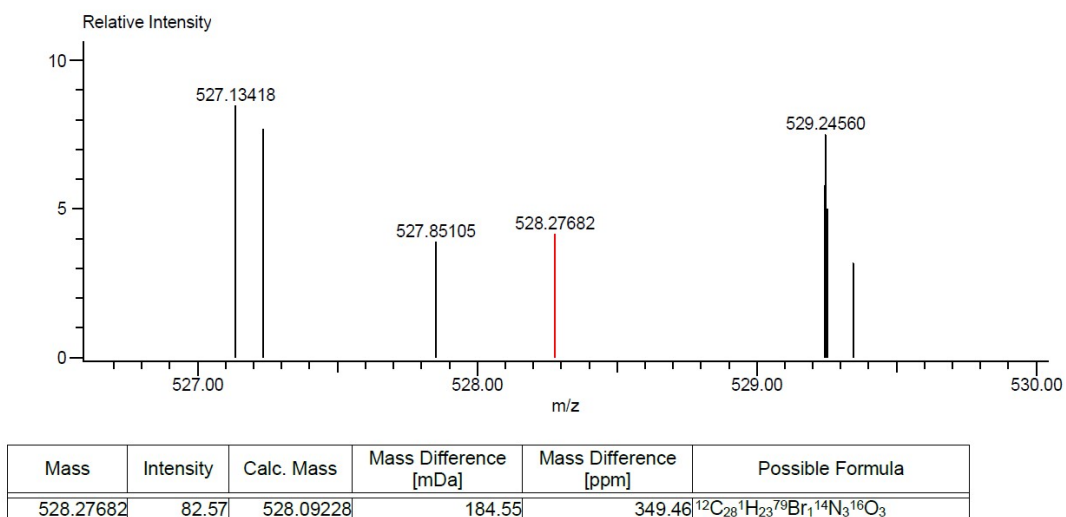

Fig. S6. HRMS spectrum for **6a**.

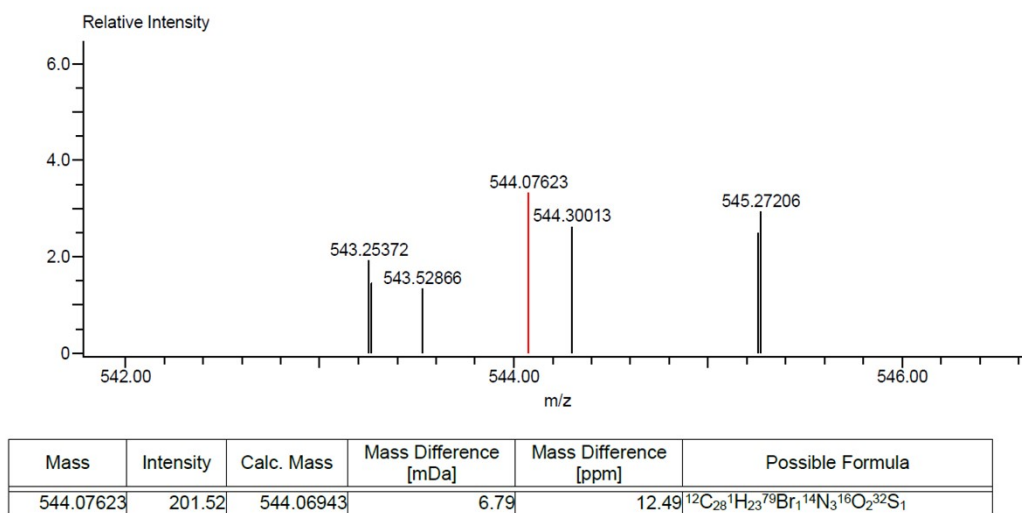

Fig. S7. HRMS spectrum for **6b**.
